# Supplementary material for: DMSO enhances the biosynthesis of epoxyquinols in Pestalotiopsis sp. (strain IQ-011) and yields new [4 + 2] cycloaddition dimers
Source: Royal Society of Chemistry journal article supplement (doi:10.1039/d5ob00115c), 2025-01-01
Supplement: d5ob00115c1.pdf [file d5ob00115c1.pdf]

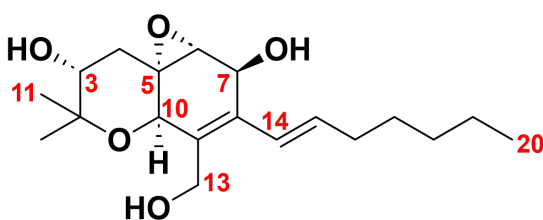

**1**

Cytosporin M

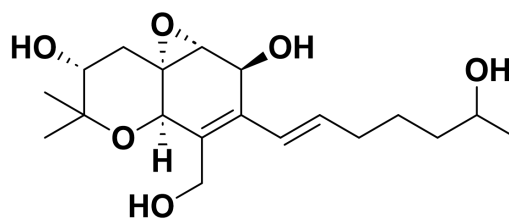

**2**

19-hydroxycytosporin M

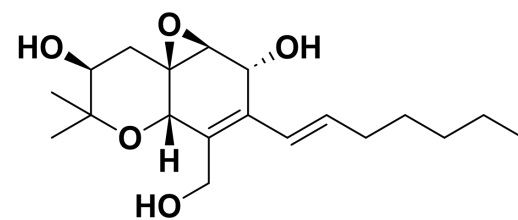

**3**

Cytosporin D

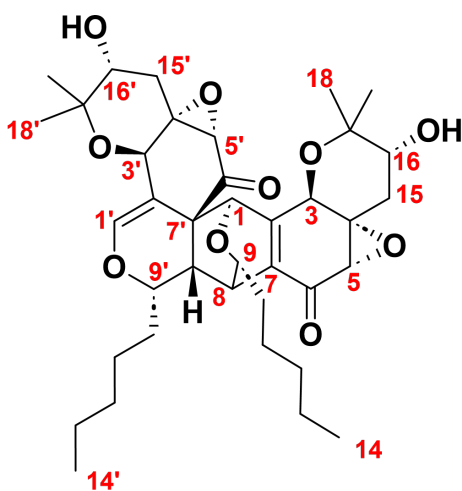

**4**

*ent*-eutyscoparol J

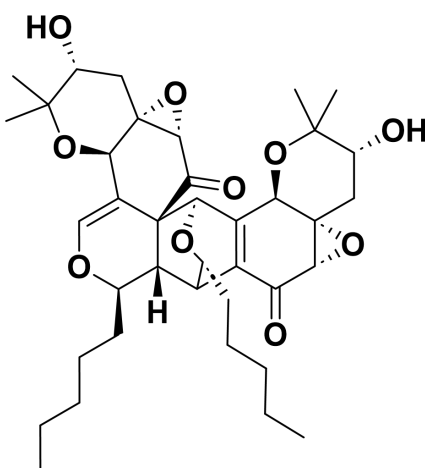

**6**

*ent*-pestaloquinol A

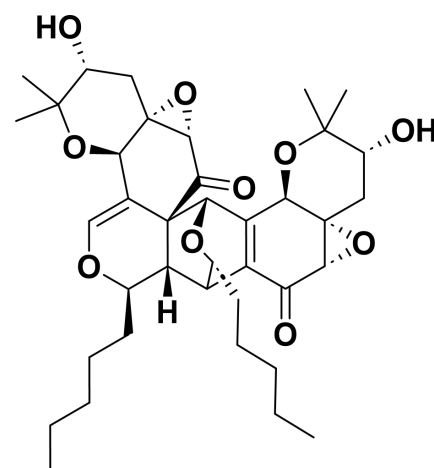

**8**

*ent*-pestaloquinol B

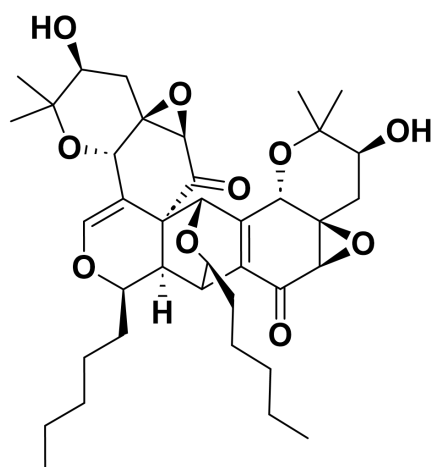

**5**

eutyscopaol J

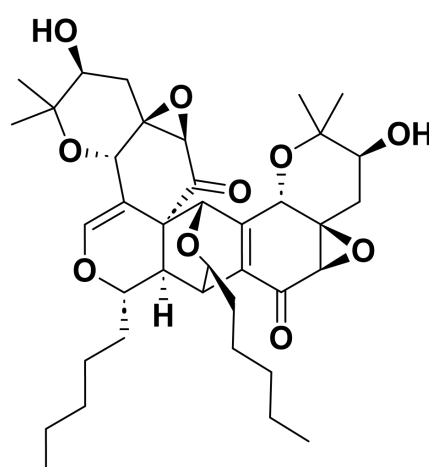

**7**

pestaloquinol A

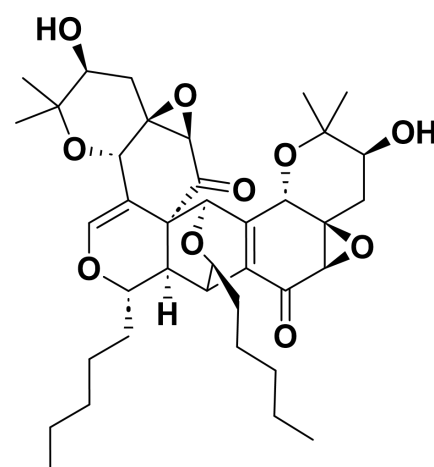

**9**

revised pestaloquinol B
